# Supplementary material for: A nano interlayer spacing and rich defect 1T-MoS2 as cathode for superior performance aqueous zinc-ion batteries
Source: Royal Society of Chemistry journal article supplement (doi:10.1039/d1na00166c), 2021-01-01
Supplement: d1na00166c1.pdf [file d1na00166c1.pdf]

## Electronic Supplementary Information

### **A nano interlayer spacing and rich defect 1T-MoS<sub>2</sub> as cathode for superior performance aqueous zinc-ion batteries**

Chengyan Cai,<sup>‡a</sup> Zengren Tao,<sup>‡a</sup> Yuanfei Zhu,<sup>a</sup> Yuanming Tan,<sup>a</sup> Anding Wang,<sup>a</sup>

Haiyun Zhou<sup>a,\*</sup> and Yangyi Yang<sup>a,\*</sup>

<sup>a</sup>School of Materials Science and Engineering, Sun Yat-sen University Test Center,

Sun Yat-sen University, Guangzhou, 510275, China.

E-mail: zhouhy@mail.sysu.edu.cn; cesyyy@mail.sysu.edu.cn

<sup>‡</sup> These authors contributed equally to this work.

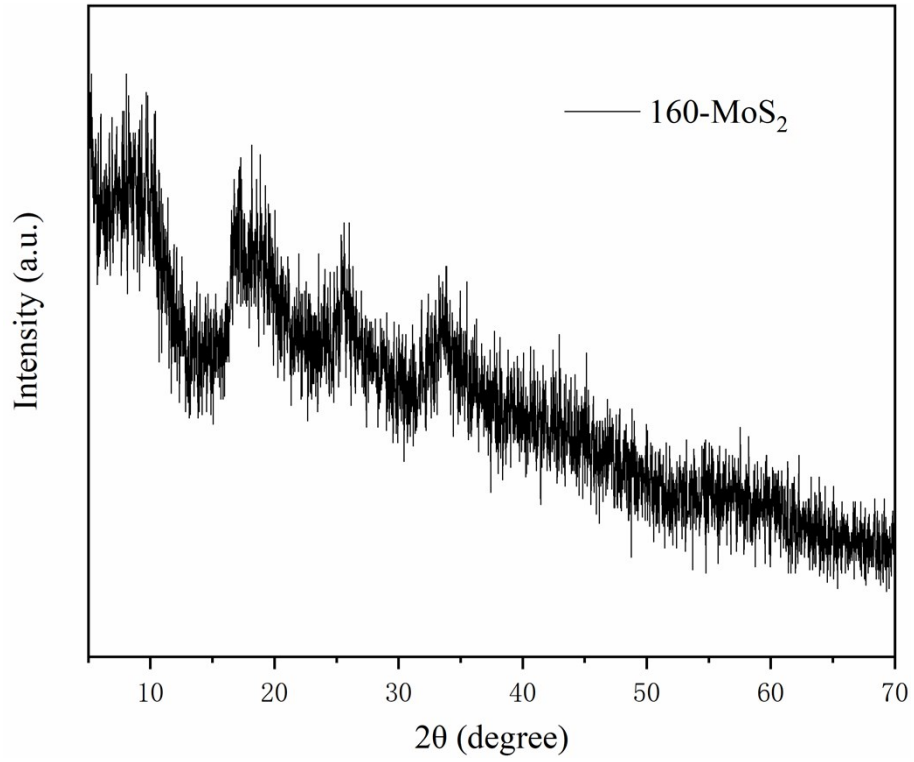

Fig. S1. XRD pattern of 160-MoS<sub>2</sub>.

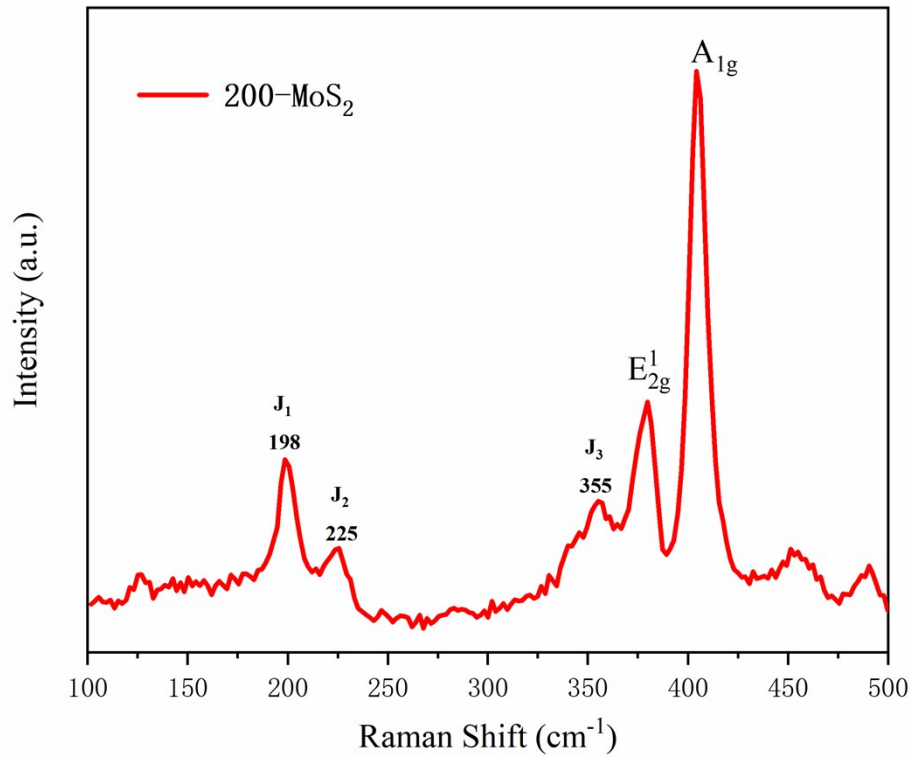

Fig. S2. Raman spectra of 200-MoS<sub>2</sub>.

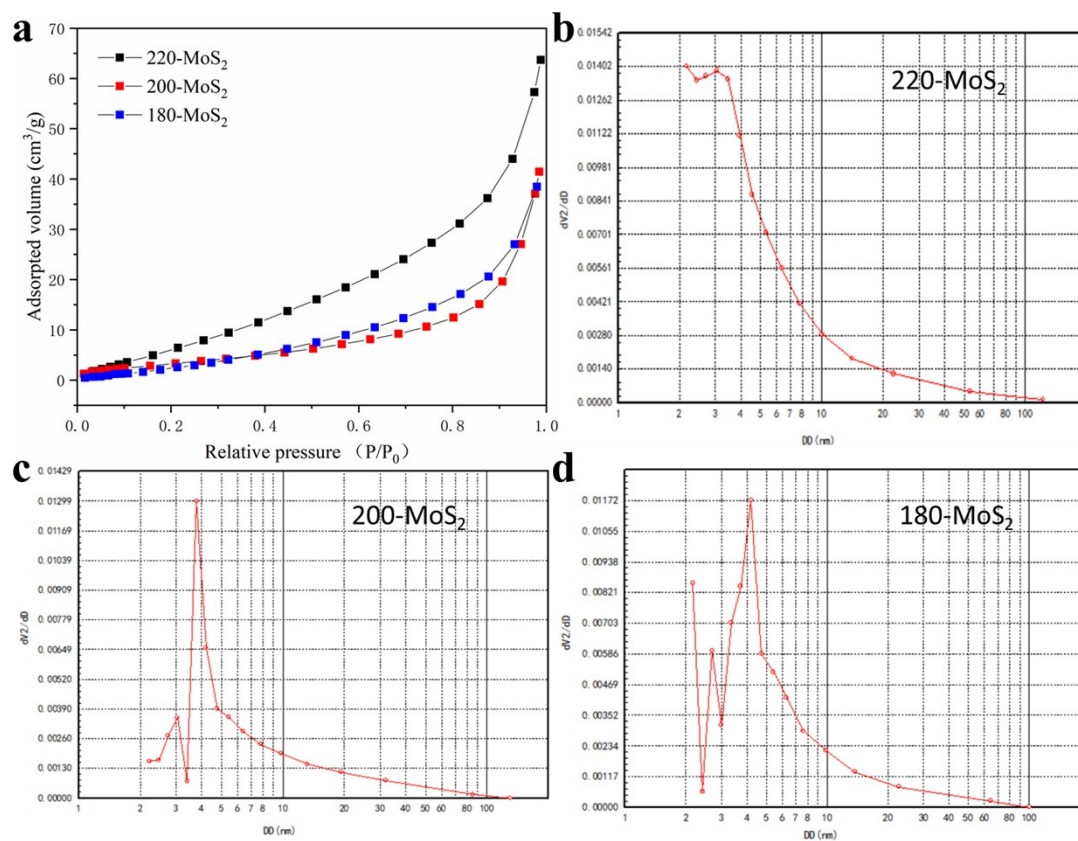

Fig. S3. (a) MoS<sub>2</sub> adsorption isotherms at different temperatures, pore volume-pore size distribution curve of (b) 220-MoS<sub>2</sub>, (c) 200-MoS<sub>2</sub>, (d) 180-MoS<sub>2</sub>.

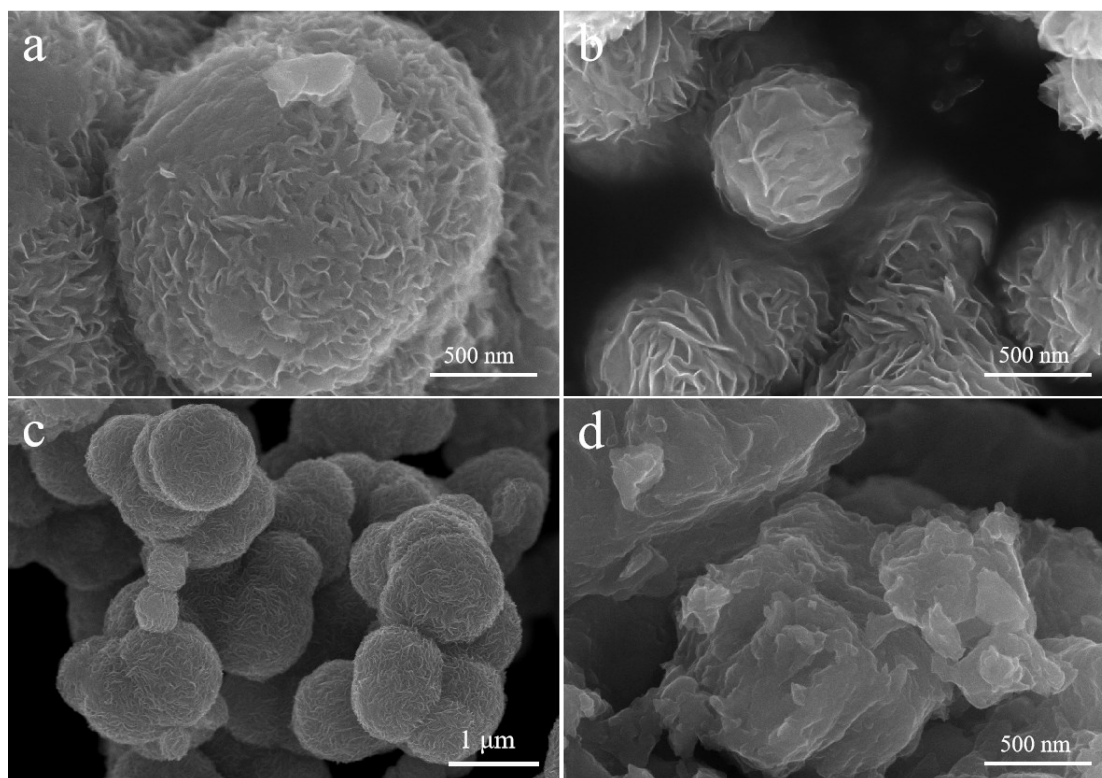

Fig. S4. TEM images of (a) 220-MoS<sub>2</sub>, (b) 200-MoS<sub>2</sub>, (c) 180-MoS<sub>2</sub>, (d) 160-MoS<sub>2</sub>.

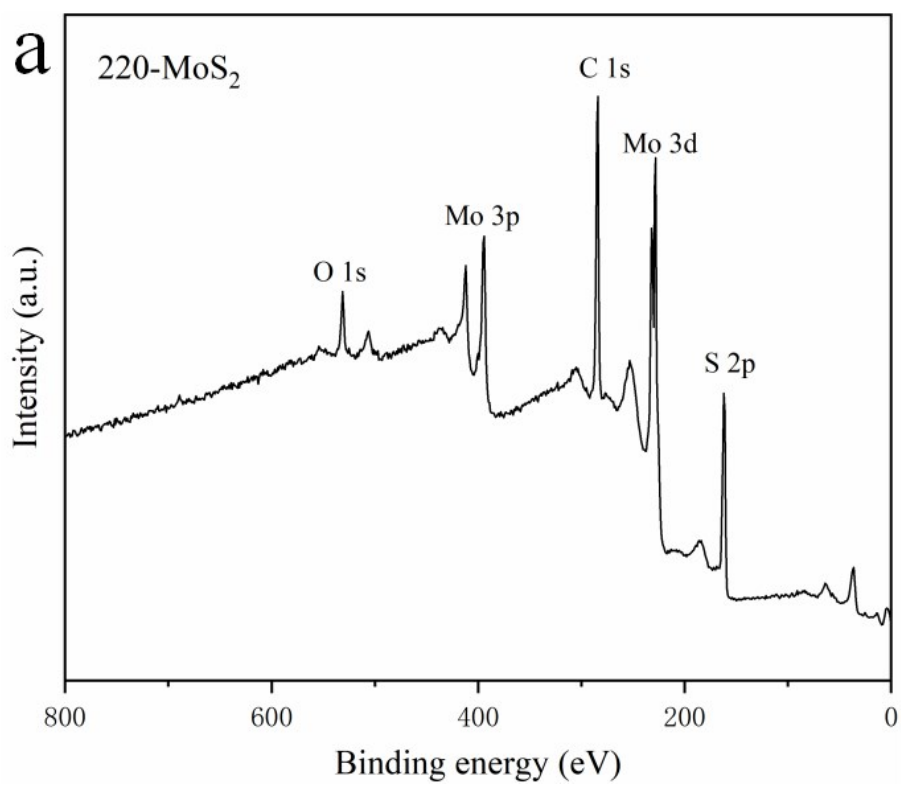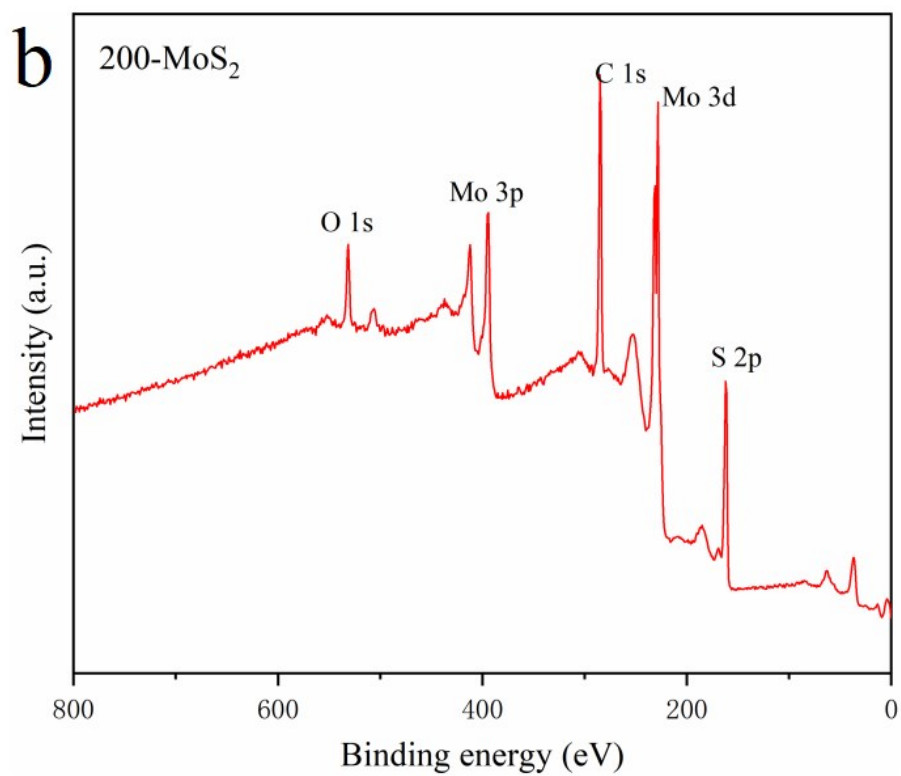

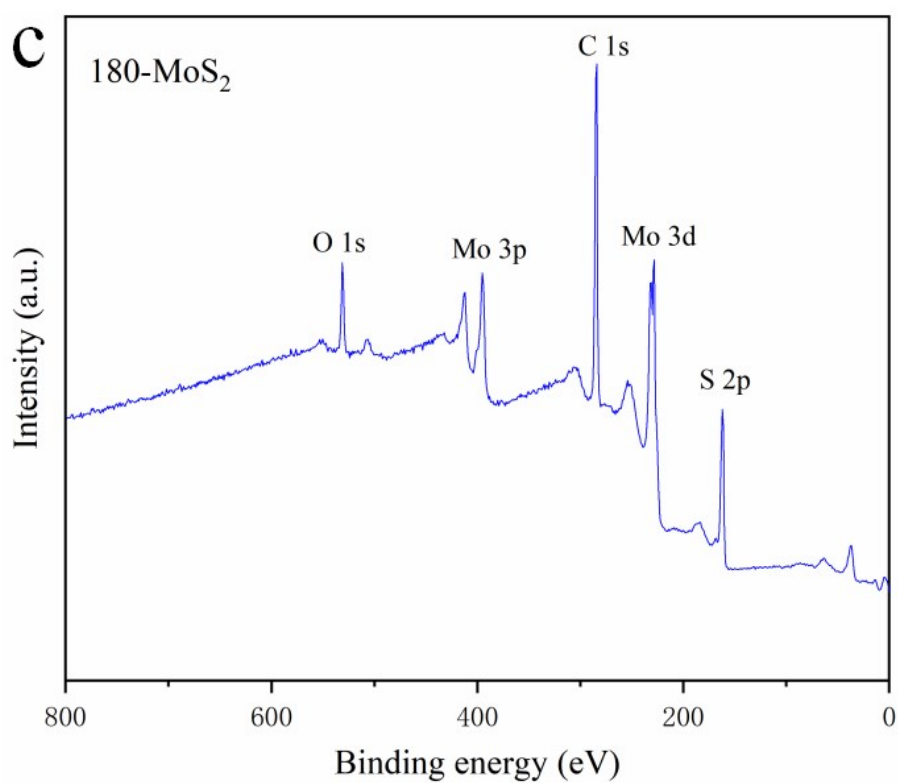

Fig. S5. Full range XPS spectra of (a) 220-MoS<sub>2</sub>, (b) 200-MoS<sub>2</sub>, (c) 180-MoS<sub>2</sub>.

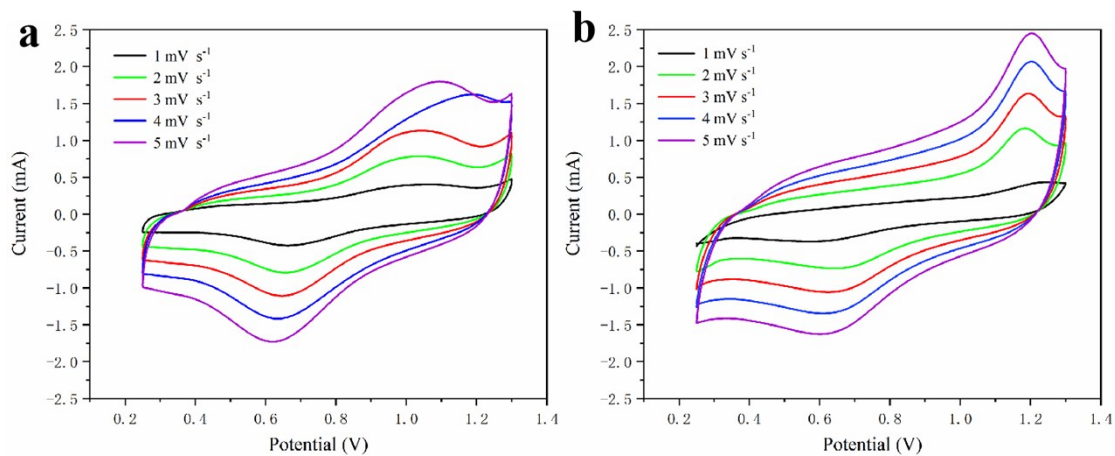

Fig. S6. (a) CV curves of 220-MoS<sub>2</sub> at different scan rates, (b) CV curves of 180-MoS<sub>2</sub> at different scan rates.

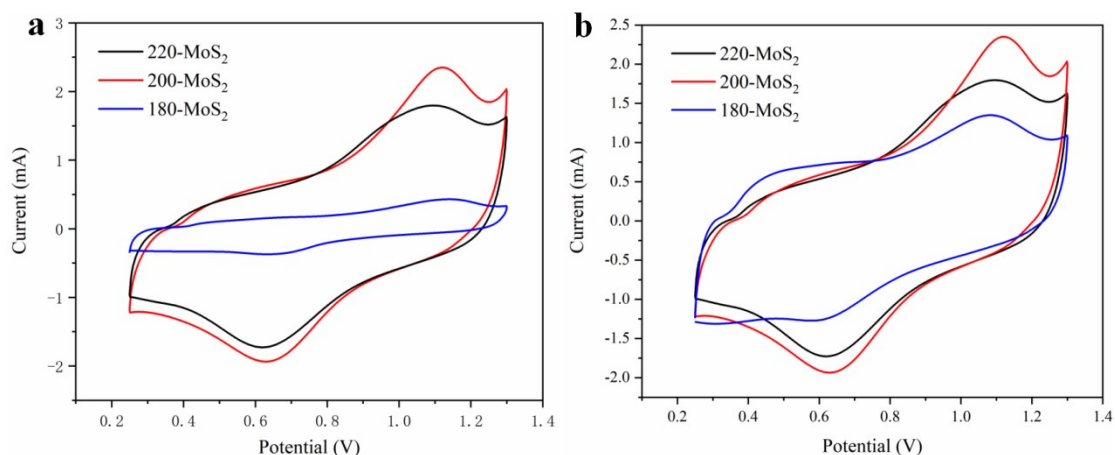

Fig. S7. (a) CV curves of 1 mV s<sup>-1</sup> at different temperature, (b) CV curves of 5 mV s<sup>-1</sup> at different temperature.

At the same scan rates, 200-MoS<sub>2</sub> has a higher redox peak. The CV curve shape of 200-MoS<sub>2</sub> at different scanning speeds is similar, indicating that it has excellent cycle stability. By contrast, the large difference in the shape of the CV curve of 180-MoS<sub>2</sub> at different scanning speeds indicates that its stability is slightly worse.

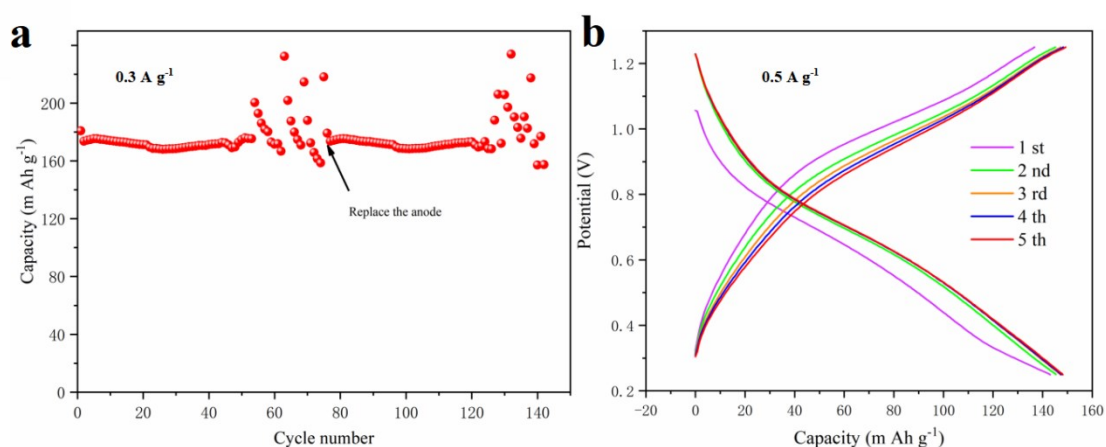

Fig. S8. (a) Cycle performance of 200-MoS<sub>2</sub> at low current density (0.5 A g<sup>-1</sup>), (b) charge/discharge curves of 200-MoS<sub>2</sub> at low current density.

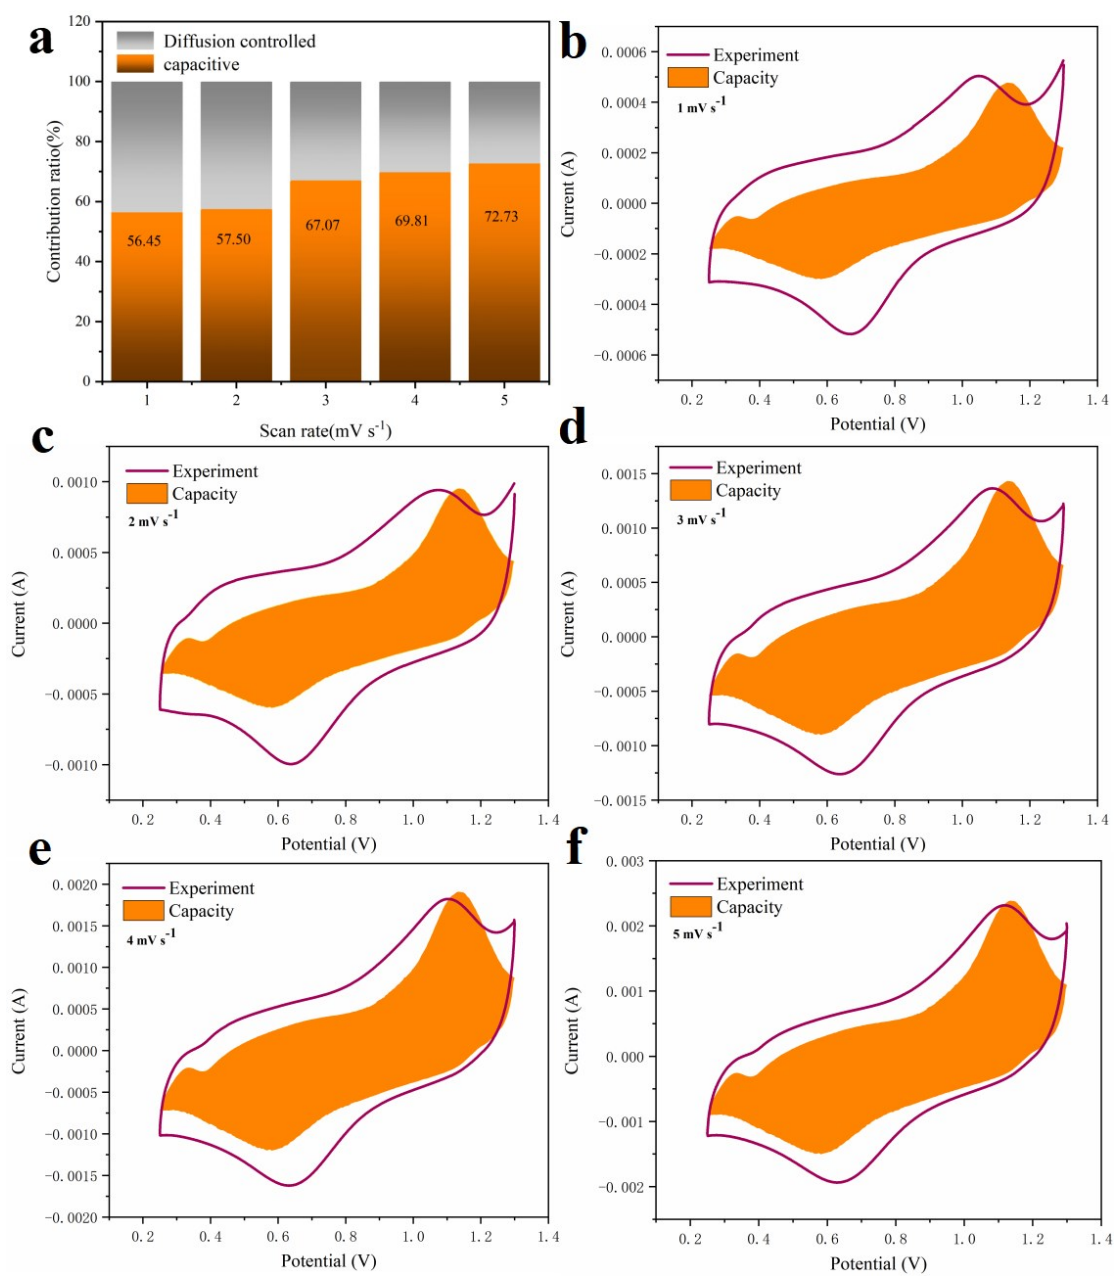

Fig. S9. 200-MoS<sub>2</sub> capacitive-controlled contribution calculation.

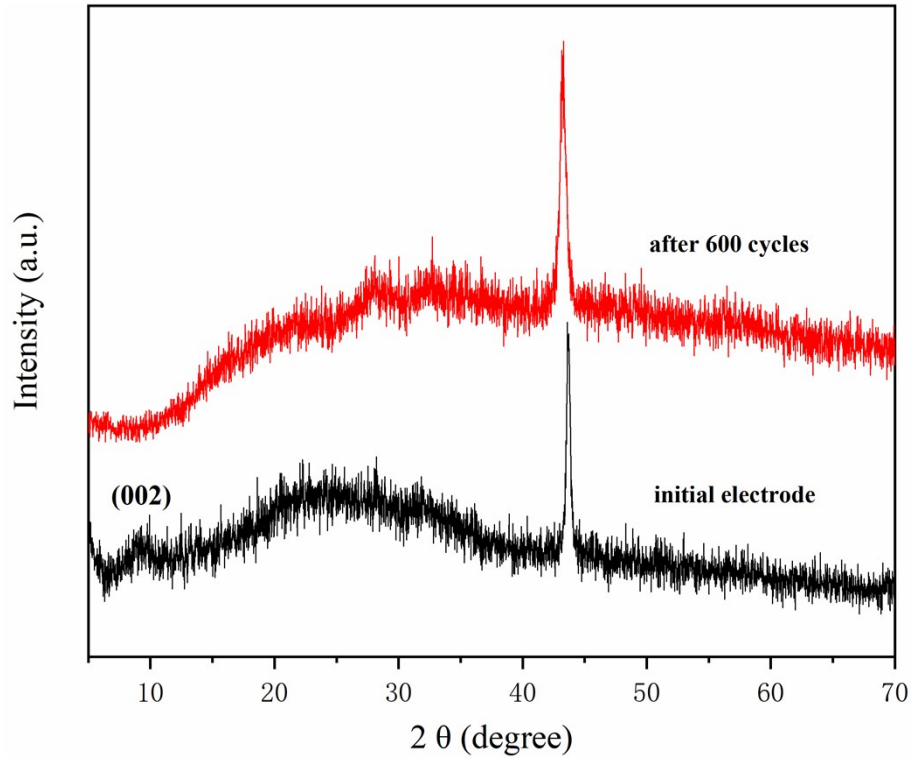

Fig. S10. XRD pattern of 200-MoS<sub>2</sub> electrode before and after cycling.

Table S1. data of specific surface area.

| Sample                                    | 220-MoS <sub>2</sub> | 200-MoS <sub>2</sub> | 180-MoS <sub>2</sub> |
|-------------------------------------------|----------------------|----------------------|----------------------|
| Specific surface area (m <sup>2</sup> /g) | 15.23                | 14.33                | 6.93                 |

Table S2. Atomic percentages of MoS<sub>2</sub> by XPS measurement.

| Atomic (%) | O 1s | S 2p  | Mo 3d | N 1s | S/Mo |
|------------|------|-------|-------|------|------|
| 220        | 5.54 | 21.66 | 8.05  | 2.5  | 2.69 |
| 200        | 7.87 | 25.59 | 10.37 | 2.07 | 2.47 |
| 180        | 7.11 | 18.69 | 6.6   | 2.23 | 2.83 |



Table S3. Energy density and power density of MoS<sub>2</sub> at different temperatures.

|                      | energy density (Wh kg <sup>-1</sup> ) |                     |                     |                     | power density (W kg <sup>-1</sup> ) |                     |                     |                     |
|----------------------|---------------------------------------|---------------------|---------------------|---------------------|-------------------------------------|---------------------|---------------------|---------------------|
|                      | 0.5 A g <sup>-1</sup>                 | 1 A g <sup>-1</sup> | 2 A g <sup>-1</sup> | 5 A g <sup>-1</sup> | 0.5 A g <sup>-1</sup>               | 1 A g <sup>-1</sup> | 2 A g <sup>-1</sup> | 5 A g <sup>-1</sup> |
| 180-MoS <sub>2</sub> | 74.93                                 | 60.41               | 51.74               | 41.75               | 325.47                              | 639.29              | 1265.68             | 3088.77             |
| 200-MoS <sub>2</sub> | 100.32                                | 87.07               | 77.99               | 66.36               | 331.99                              | 674.81              | 1309.02             | 3257.61             |
| 220-MoS <sub>2</sub> | 65.70                                 | 56.13               | 47.3                | 37.14               | 348.05                              | 683.32              | 1332.64             | 3261.62             |

Table S4. The fitting values of impedance parameters of MoS<sub>2</sub> at different temperatures.

| Sample               | R <sub>1</sub> /Ω | R <sub>2</sub> /Ω | R <sub>3</sub> /Ω |
|----------------------|-------------------|-------------------|-------------------|
| 220-MoS <sub>2</sub> | 5.124             | 4.753             | 411.5             |
| 200-MoS <sub>2</sub> | 4.454             | 44.99             | 337.9             |
| 180-MoS <sub>2</sub> | 3.829             | 64.06             | 437.1             |

Table S5. 200-MoS<sub>2</sub> capacitive-controlled contribution calculation results.

|              | 1 mV s <sup>-1</sup> | 2 mV s <sup>-1</sup> | 3 mV s <sup>-1</sup> | 4 mV s <sup>-1</sup> | 5 mV s <sup>-1</sup> |
|--------------|----------------------|----------------------|----------------------|----------------------|----------------------|
| Experiment   | 0.000543075          | 0.00106638           | 0.00137118           | 0.00175627           | 0.0021075            |
| Capacitive   | 0.000306563          | 0.000613125          | 0.000919688          | 0.00122625           | 0.0015328            |
| Contribution | 56.4%                | 57.5%                | 67.1%                | 69.8%                | 72.7%                |

Table S6. Comparison of the Zn ion storage performance of MoS<sub>2</sub> (in this work) and other recently reported Zn-ion battery cathodes.

| Cathode material               | Electrolyte                                           | Specific capacity         | Current density       | Reference |
|--------------------------------|-------------------------------------------------------|---------------------------|-----------------------|-----------|
| MoS <sub>2</sub>               | 3 M Zn(CF <sub>3</sub> SO <sub>3</sub> ) <sub>2</sub> | 155 mA h g <sup>-1</sup>  | 0.5 A g <sup>-1</sup> | This work |
| Mo <sub>6</sub> S <sub>8</sub> | 1 M ZnSO <sub>4</sub>                                 | 60 mA h g <sup>-1</sup>   | 60 mA g <sup>-1</sup> | 1         |
| MoS <sub>2</sub>               | 3 M Zn(CF <sub>3</sub> SO <sub>3</sub> ) <sub>2</sub> | 134 mA h g <sup>-1</sup>  | 0.5 A g <sup>-1</sup> | 2         |
| MoS <sub>2-x</sub>             | 3 M Zn(CF <sub>3</sub> SO <sub>3</sub> ) <sub>2</sub> | 88.6 mA h g <sup>-1</sup> | 1 A g <sup>-1</sup>   | 3         |
| WS <sub>2</sub>                | 2 M ZnSO <sub>4</sub>                                 | 22 mA h g <sup>-1</sup>   | 50 mA g <sup>-1</sup> | 4         |

|                                                  |                                                                          |                            |                         |    |
|--------------------------------------------------|--------------------------------------------------------------------------|----------------------------|-------------------------|----|
| VS <sub>2</sub>                                  | 1 M ZnSO <sub>4</sub>                                                    | 190.3 mA h g <sup>-1</sup> | 0.05 A g <sup>-1</sup>  | 5  |
| VS <sub>2</sub> flake                            | 1 M ZnSO <sub>4</sub>                                                    | 125 mA h g <sup>-1</sup>   | 200 mA g <sup>-1</sup>  | 6  |
| ZnHCF                                            | 1 M ZnSO <sub>4</sub>                                                    | 52.5 mA h g <sup>-1</sup>  | 300 mA g <sup>-1</sup>  | 7  |
| CuHCF                                            | 20 mM ZnSO <sub>4</sub>                                                  | ~50 mA h g <sup>-1</sup>   | 60 mA g <sup>-1</sup>   | 8  |
| α-MnO <sub>2</sub>                               | 1 M ZnSO <sub>4</sub>                                                    | 210 mA h g <sup>-1</sup>   | 21 mA g <sup>-1</sup>   | 9  |
| ZnMn <sub>2</sub> O <sub>4</sub>                 | 3 M Zn(CF <sub>3</sub> SO <sub>3</sub> ) <sub>2</sub>                    | 150 mA h g <sup>-1</sup>   | 0.5 A g <sup>-1</sup>   | 10 |
| Quinones                                         | 3 M Zn(CF <sub>3</sub> SO <sub>3</sub> ) <sub>2</sub>                    | 120 mA h g <sup>-1</sup>   | 500 mA g <sup>-1</sup>  | 11 |
| Polyaniline                                      | 1 M Zn(CF <sub>3</sub> SO <sub>3</sub> ) <sub>2</sub>                    | 82 mA h g <sup>-1</sup>    | 5 A g <sup>-1</sup>     | 12 |
| LiV <sub>2</sub> (PO <sub>4</sub> ) <sub>3</sub> | 4 mol kg <sup>-1</sup> Zn(CF <sub>3</sub> SO <sub>3</sub> ) <sub>2</sub> | ~110 mA h g <sup>-1</sup>  | 1500 mA g <sup>-1</sup> | 13 |

## References

- 1 Cheng, Yingwen, Luo, Langli, Zhong, Li, Chen, Junzheng and Li, Bin, *Acs Applied Materials & Interfaces* 2016, 8, 13673.
- 2 A. JL, B.PX, A. WP et al., *Chemical Engineering Journal* 2020, 389, 124405.
- 3 A. Wx et al., *Energy Storage Materials* 2019, 16, 527-534.
- 4 W. Liu, J. Hao, C. Xu, M. Jian, F. Kang, *Chemical Communications*, 2017, 53, 6872-6874.
- 5 P. He et al., *Advanced Energy Materials* 2017, 7, 1601920.
- 6 Z. Wang et al., *Nano Energy* 2019, 56, 92-99.
- 7 L. Zhang, L. Chen, X. Zhou, Z. Liu, *Advanced Energy Materials*, 2015, 5, 1400930.
- 8 R. Trócoli, F. Lamantia, *ChemSusChem*, 2015, 8, 481-5.
- 9 B. Lee, S. Y. Chong, H. R. Lee, K. Y. Chung, H. O. Si, *Scientific Reports*, 2014, 4, 6066.
- 10 Ning et al., *Am. Chem. Soc.* 2016, 138, 12894-12901.
- 11 Q. Zhao, W. Huang, Z. Luo, L. Liu, L. Yong, *Science Advances*, 2018, 4, eaao1761.
- 12 F. Wan et al., *Advanced Functional Materials*, 2018, 28, 1804975.
- 13 F. Wang et al., *Energy & Environmental Science*, 2018, 11, 3168-3175.
